# Supplementary material
Source: ML conference proceedings conference paper supplement (https://openaccess.thecvf.com/content/CVPR2023/html/Ma_Towards_Better_Gradient_CVPR_2023_paper.html)
Supplement: Supplementary file 2 [file Ma_Towards_Better_Gradient_CVPR_2023_supplemental.zip]

Archive with 2 entries (2 files):
- CVPR2023_GradientConsistency.mp4
- CVPR_2023_TowardsBetterGradient_supplemental.pdf
